# Supplementary material
Source: PubMed Central journal article supplement (PMC5712259)
Supplement: NIHMS906682-supplement-supplement_1.pdf [file NIHMS906682-supplement-supplement_1.pdf]

Supplemental Table 1. Multivariable Cox proportional hazard model of predictors of mortality in young women with endometrial carcinoma by grade.

|                          | <b>Grade 1<br/>HR (95%CI)</b> | <b>Grade 2 or 3<br/>HR (95%CI)</b> |
|--------------------------|-------------------------------|------------------------------------|
| <i>Hormonal therapy</i>  |                               |                                    |
| No                       | Referent                      | Referent                           |
| Yes                      | 2.26 (1.25 - 4.10)*           | 2.12 (0.70 - 6.39)                 |
| <i>Age</i>               |                               |                                    |
| <35                      | Referent                      | Referent                           |
| 35-39                    | 1.38 (0.81-2.37)              | 0.95 (0.40-2.22)                   |
| 40-44                    | 1.34 (0.78-2.31)              | 2.05 (1.05-4.01)*                  |
| 45-49                    | 1.63 (1.01-2.63)*             | 2.71 (1.32-5.56)*                  |
| <i>Race</i>              |                               |                                    |
| White                    | Referent                      | Referent                           |
| Black                    | 1.47 (0.90-2.40)              | 1.13 (0.74-1.71)                   |
| Hispanic                 | 0.67 (0.40-1.12)              | 0.79 (0.47-1.33)                   |
| Other                    | 0.69 (0.32-1.49)              | 0.55 (0.25-1.21)                   |
| Unknown                  | 1.69 (1.09-2.62)*             | 1.05 (0.67-1.66)                   |
| <i>Insurance Status</i>  |                               |                                    |
| Private Insurance        | Referent                      | Referent                           |
| Medicaid                 | 2.57 (1.74-3.81)*             | 2.00 (1.34-2.99)*                  |
| Medicare                 | 3.27 (2.07-5.15)*             | 3.32 (1.82-6.08)*                  |
| Not Insured              | 1.23 (0.73-2.07)              | 1.47 (0.91-2.38)                   |
| Other/Unknown            | 1.41 (0.70-2.85)              | 1.49 (0.73-3.05)                   |
| <i>Median Income</i>     |                               |                                    |
| < \$30,000               | Referent                      | Referent                           |
| \$30,000 - \$35,999      | 0.92 (0.58-1.45)              | 0.81 (0.49-1.34)                   |
| \$36,000 - \$45,999      | 0.82 (0.54-1.23)              | 0.86 (0.57-1.31)                   |
| ≥\$46,000                | 0.47 (0.30-0.73)*             | 0.88 (0.53-1.45)                   |
| Unknown                  | 0.85 (0.42- 1.73)             | 1.02 (0.51-2.05)                   |
| <i>Urban/Rural</i>       |                               |                                    |
| Metropolitan             | Referent                      | Referent                           |
| Urban                    | 1.07 (0.75-1.54)              | 0.89 (0.61-1.29)                   |
| Rural                    | 1.03 (0.42-2.49)              | 1.68 (0.85-3.32)                   |
| Unknown                  | 1.28 (0.62-2.65)              | 1.60 (0.89-2.88)                   |
| <i>Comorbidity Score</i> |                               |                                    |
| 0                        | Referent                      | Referent                           |
| 1                        | 1.72 (1.18-2.52)*             | 1.69 (1.24-2.30)*                  |
| 2                        | 3.15 (2.02-4.90)*             | 2.20 (1.39-3.46)*                  |
| <i>Year of diagnosis</i> | 1.01 (0.95-1.08)              | 0.96 (0.88-1.05)                   |
| <i>Stage</i>             |                               |                                    |
| IA                       | Referent                      | Referent                           |
| IB                       | 3.41 (1.99-5.84)*             | 2.10 (1.53-2.90)*                  |
| INOS                     | 1.44 (0.96-2.15)              | 1.16 (0.59-2.26)                   |
| <i>Grade</i>             |                               |                                    |
| 1                        | -                             | -                                  |
| 2                        | -                             | -                                  |

|         |   |   |
|---------|---|---|
| 3       | - | - |
| Unknown | - | - |

*Histology*

|              |                    |                    |
|--------------|--------------------|--------------------|
| Endometrioid | Referent           | Referent           |
| EM_NOS       | 0.73 (0.48 - 1.11) | 1.28 (0.89 - 1.82) |

Cohort derived from propensity score using inverse probability of treatment weighting.

#Year of diagnosis was fit as continuous variable in multivariable regression model.

\*P<0.05

Supplemental Table2. Multivariable Cox proportional hazard model of predictors of mortality in young women with endometrial carcinoma.

|                         | Overall cohort<br>HR (95%CI) | Stage IA<br>HR (95%CI) | Stage IB<br>HR (95%CI) | Stage INOS<br>HR (95%CI) | Grade 1<br>HR (95%CI) | Grade 2 or 3<br>HR (95%CI) |
|-------------------------|------------------------------|------------------------|------------------------|--------------------------|-----------------------|----------------------------|
| <i>Hormonal therapy</i> |                              |                        |                        |                          |                       |                            |
| No                      | Referent                     | Referent               | Referent               | Referent                 | Referent              | Referent                   |
| Yes                     | 1.79 (1.14 - 2.83)*          | 1.12 (0.54 - 2.32)     | 4.26 (1.22 - 14.88)*   | 2.71 (1.26 - 5.86)*      | 2.24 (1.31 - 3.82)*   | 1.43 (0.49 - 4.18)         |
| <i>Age</i>              |                              |                        |                        |                          |                       |                            |
| <35                     | Referent                     | Referent               | Referent               | Referent                 | Referent              | Referent                   |
| 35-39                   | 1.19 (0.79 - 1.79)           | 1.21 (0.76 - 1.91)     | 2.17 (0.54 - 8.69)     | 0.59 (0.18 - 1.86)       | 1.35 (0.81 - 2.25)    | 1.02 (0.47 - 2.20)         |
| 40-44                   | 1.52 (1.05 - 2.19)*          | 1.48 (0.99 - 2.21)     | 1.95 (0.57 - 6.66)     | 1.54 (0.62 - 3.82)       | 1.26 (0.77 - 2.05)    | 2.05 (1.07 - 3.93)*        |
| 45-49                   | 1.83 (1.29 - 2.61)*          | 1.61 (1.08 - 2.40)*    | 4.19 (1.31 - 13.36)*   | 1.91 (0.79 - 4.59)       | 1.64 (1.03 - 2.61)*   | 2.19 (1.16 - 4.17)*        |
| <i>Race</i>             |                              |                        |                        |                          |                       |                            |
| White                   | Referent                     | Referent               | Referent               | Referent                 | Referent              | Referent                   |
| Black                   | 1.30 (1.00 - 1.69)*          | 1.32 (0.98 - 1.77)     | 0.62 (0.22 - 1.71)     | 2.36 (1.20 - 4.63)*      | 1.45 (1.00 - 2.12)    | 1.22 (0.82 - 1.80)         |
| Hispanic                | 0.82 (0.60 - 1.11)           | 0.87 (0.59 - 1.27)     | 0.56 (0.21 - 1.51)     | 0.77 (0.31 - 1.89)       | 0.76 (0.47 - 1.24)    | 0.87 (0.53 - 1.43)         |
| Other                   | 0.60 (0.37 - 0.99)*          | 0.57 (0.31 - 1.05)     | 0.19 (0.02 - 1.53)     | 1.38 (0.48 - 3.98)       | 0.67 (0.34 - 1.33)    | 0.66 (0.32 - 1.39)         |
| Unknown                 | 1.33 (0.98 - 1.80)           | 1.16 (0.81 - 1.68)     | 1.54 (0.77 - 3.06)     | 2.14 (1.13 - 4.06)*      | 1.65 (1.10 - 2.48)*   | 1.09 (0.69 - 1.70)         |
| <i>Insurance Status</i> |                              |                        |                        |                          |                       |                            |
| Private Insurance       | Referent                     | Referent               | Referent               | Referent                 |                       |                            |
| Medicaid                | 2.37 (1.86 - 3.01)**         | 2.53 (1.92 - 3.34)**   | 1.57 (0.76 - 3.23)     | 2.90 (1.52 - 5.52)*      | 2.59 (1.82 - 3.68)**  | 1.99 (1.40 - 2.83)*        |
| Medicare                | 3.22 (2.51 - 4.13)**         | 3.29 (2.44 - 4.44)**   | 2.57 (1.40 - 4.72)*    | 3.33 (1.57 - 7.06)*      | 3.75 (2.63 - 5.34)**  | 2.87 (1.99 - 4.13)**       |
| Not Insured             | 1.52 (1.11 - 2.07)*          | 1.62 (1.11 - 2.35)*    | 1.40 (0.61 - 3.20)     | 1.23 (0.41 - 3.71)       | 1.47 (0.91 - 2.39)    | 1.45 (0.90 - 2.33)         |
| Other/Unknown           | 1.79 (1.21 - 2.67)*          | 1.52 (0.87 - 2.65)     | 2.06 (0.61 - 6.94)     | 2.78 (1.05 - 7.33)*      | 1.59 (0.82 - 3.08)    | 1.44 (0.72 - 2.87)         |
| <i>Median Income</i>    |                              |                        |                        |                          |                       |                            |
| < \$30,000              | Referent                     | Referent               | Referent               | Referent                 | Referent              | Referent                   |
| \$30,000 - \$35,999     | 0.78 (0.60 - 1.01)           | 0.74 (0.55 - 0.99)*    | 0.76 (0.38 - 1.53)     | 1.03 (0.46 - 2.31)       | 0.79 (0.56 - 1.13)    | 0.72 (0.48 - 1.08)         |
| \$36,000 - \$45,999     | 0.78 (0.61 - 1.01)           | 0.73 (0.55 - 0.96)*    | 0.83 (0.43 - 1.63)     | 1.03 (0.51 - 2.09)       | 0.65 (0.46 - 0.94)*   | 0.83 (0.56 - 1.22)         |
| >\$46,000               | 0.61 (0.47 - 0.79)*          | 0.58 (0.43 - 0.79)*    | 0.61 (0.31 - 1.21)     | 0.95 (0.45 - 2.00)       | 0.49 (0.34 - 0.73)*   | 0.71 (0.49 - 1.03)         |
| Unknown                 | 0.87 (0.55 - 1.36)           | 0.80 (0.47 - 1.34)     | 1.79 (0.60 - 5.33)     | 0.28 (0.03 - 3.02)       | 0.87 (0.45 - 1.68)    | 0.91 (0.47 - 1.77)         |
| <i>Urban/Rural</i>      |                              |                        |                        |                          |                       |                            |
| Metropolitan            | Referent                     | Referent               | Referent               | Referent                 | Referent              | Referent                   |
| Urban                   | 1.10 (0.89 - 1.36)           | 1.16 (0.88 - 1.52)     | 1.25 (0.72 - 2.17)     | 0.65 (0.31 - 1.38)       | 1.21 (0.89 - 1.66)    | 0.98 (0.70 - 1.36)         |
| Rural                   | 1.38 (0.88 - 2.17)           | 1.55 (0.93 - 2.59)     | 0.93 (0.22 - 3.89)     | 1.37 (0.29 - 6.45)       | 1.30 (0.58 - 2.91)    | 1.60 (0.81 - 3.13)         |
| Unknown                 | 1.75 (1.19 - 2.57)*          | 1.78 (1.12 - 2.82)*    | 2.01 (0.77 - 5.22)     | 1.22 (0.26 - 5.80)       | 1.65 (0.84 - 3.25)    | 1.81 (1.04 - 3.15)*        |

| <i>Comorbidity Score</i> |                      |                      |                     |                       |                      |                      |
|--------------------------|----------------------|----------------------|---------------------|-----------------------|----------------------|----------------------|
| 0                        | Referent             | Referent             | Referent            | Referent              | Referent             | Referent             |
| 1                        | 1.67 (1.36 - 2.04)** | 1.71 (1.36 - 2.15)** | 1.27 (0.73 - 2.21)  | 1.65 (0.89 - 3.06)    | 1.37 (1.01 - 1.85)*  | 1.87 (1.41 - 2.47)** |
| 2                        | 2.60 (1.93 - 3.51)** | 2.16 (1.48 - 3.16)** | 2.96 (1.44 - 6.10)* | 5.43 (2.77 - 10.63)** | 2.71 (1.80 - 4.09)** | 2.41 (1.56 - 3.73)** |
| <i>Year of diagnosis</i> | 0.99 (0.95 - 1.02)   | 0.95 (0.91 - 1.00)   | 1.07 (0.98 - 1.17)  | 1.03 (0.93 - 1.15)    | 1.00 (0.94 - 1.05)   | 0.97 (0.92 - 1.03)   |
| <i>Stage</i>             |                      |                      |                     |                       |                      |                      |
| IA                       | Referent             | NA                   | NA                  | NA                    | Referent             | Referent             |
| IB                       | 2.08 (1.64 - 2.64)** | NA                   | NA                  | NA                    | 2.54 (1.68 - 3.84)** | 2.25 (1.67 - 3.03)** |
| INOS                     | 1.08 (0.85 - 1.38)   | NA                   | NA                  | NA                    | 1.09 (0.79 - 1.52)   | 1.00 (0.64 - 1.55)   |
| <i>Grade</i>             |                      |                      |                     |                       |                      |                      |
| 1                        | Referent             | Referent             | Referent            | Referent              | NA                   | NA                   |
| 2                        | 1.45 (1.20 - 1.74)*  | 1.48 (1.19 - 1.83)*  | 1.15 (0.67 - 1.99)  | 1.43 (0.82 - 2.50)    | NA                   | NA                   |
| 3                        | 3.01 (2.34 - 3.88)** | 3.22 (2.41 - 4.32)** | 2.26 (1.26 - 4.05)* | 2.71 (0.96 - 7.69)    | NA                   | NA                   |
| Unknown                  | 1.39 (1.01 - 1.92)*  | 1.56 (1.06 - 2.28)*  | 0.72 (0.26 - 1.99)  | 1.32 (0.63 - 2.77)    | NA                   | NA                   |
| <i>Histology</i>         |                      |                      |                     |                       |                      |                      |
| Endometrioid             | Referent             | Referent             | Referent            | Referent              | Referent             | Referent             |
| EM_NOS                   | 1.02 (0.80 - 1.30)   | 1.04 (0.77 - 1.40)   | 1.23 (0.68 - 2.24)  | 0.74 (0.36 - 1.51)    | 0.89 (0.62 - 1.28)   | 1.33 (0.94 - 1.89)   |
